# Supplementary material
Source: publisher figshare collection journal article supplement (https://frontiersin.figshare.com/ndownloader/files/22364199)
Supplement: Supplementary file [file 22364199]

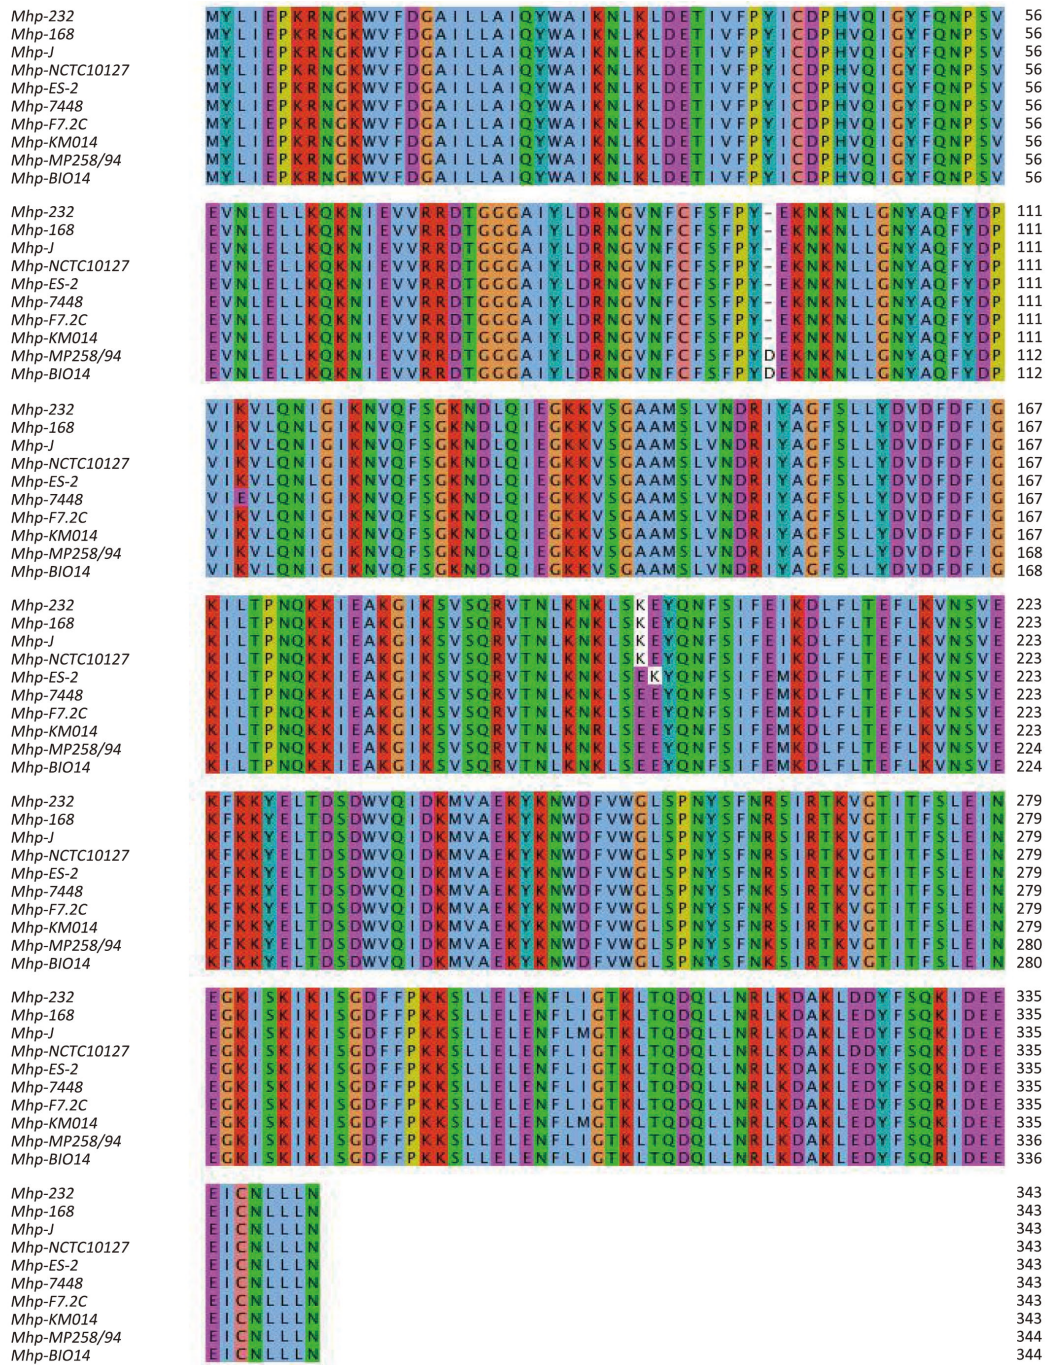

**Figure S1:** Protein sequences alignment among the Lpls from different strains of *M. hyopneumoniae*

|               |                                                              |     |
|---------------|--------------------------------------------------------------|-----|
| Mhp-232       | MKKIANFLIIEQNEIFTIYLTAEQQDLCTIGFLFTNKRLEKDDVVAIEASKT         | 57  |
| Mhp-J         | MKKIANFLIIEQNEIFTIYLTAEQQDLCTIGFLFTNKRLEKDDVVAIEASKT         | 57  |
| Mhp-NCTC10127 | MKKIANFLIIEQNEIFTIYLTAEQQDLCTIGFLFTNKRLEKDDVVAIEASKT         | 57  |
| Mhp-ES-2      | MKKIANFLIIEQNEIFTIYLTAEQQDLCTIGFLFTNKRLEKDDVVAIEASKT         | 57  |
| Mhp-F7.2C     | MKKIANFLIIEQNEIFTIYLTAEQQDLCTIGFLFTNKRLEKDDVVAIEASKT         | 57  |
| Mhp-168       | MKKIANFLIIEQNEIFTIYLTAEQQDLCTIGFLFTNKRLEKDDVVAIEASKT         | 57  |
| Mhp-7448      | MKKIANFLIIEQNEIFTIYLTAEQQDLCTIGFLFTNKRLEKDDVVAIEASKT         | 57  |
| Mhp-KM014     | MKKIANFLIIEQNEIFTIYLTAEQQDLCTIGFLFTNKRLEKDDVVAIEASKT         | 57  |
| Mhp-MP258/94  | MKKIANFLIIEQNEIFTIYLTAEQQDLCTIGFLFTNKRLEKDDVVAIEASKT         | 57  |
| Mhp-BIO14     | MKKIANFLIIEQNEIFTIYLTAEQQDLCTIGFLFTNKRLEKDDVVAIEASKT         | 57  |
|               |                                                              |     |
| Mhp-232       | VFSIXTP LXCR I I I ELNQLAEKDPK I LNSHDSKNWLFKAKDIDQSEFDELEDF | 110 |
| Mhp-J         | VFSIXTP LXCR I I I ELNQLAEKDPK I LNSHDSKNWLFKAKDIDQSEFDELEDF | 110 |
| Mhp-NCTC10127 | VFSIXTP LXCR I I I ELNQLAEKDPK I LNSHDSKNWLFKAKDIDQSEFDELEDF | 110 |
| Mhp-ES-2      | VFSIXTP LXCR I I I ELNQLAEKDPK I LNSHDSKNWLFKAKDIDQSEFDELEDF | 110 |
| Mhp-F7.2C     | VFSIXTP LXCR I I I ELNQLAEKDPK I LNSHDSKNWLFKAKDIDQSEFDELEDF | 110 |
| Mhp-168       | VFSIXTP LXCR I I I ELNQLAEKDPK I LNSHDSKNWLFKAKDIDQSEFDELEDF | 110 |
| Mhp-7448      | VFSIXTP LXCR I I I ELNQLAEKDPK I LNSHDSKNWLFKAKDIDQSEFDELEDF | 110 |
| Mhp-KM014     | VFSIXTP LXCR I I I ELNQLAEKDPK I LNSHDSKNWLFKAKDIDQSEFDELEDF | 110 |
| Mhp-MP258/94  | VFSIXTP LXCR I I I ELNQLAEKDPK I LNSHDSKNWLFKAKDIDQSEFDELEDF | 110 |
| Mhp-BIO14     | VFSIXTP LXCR I I I ELNQLAEKDPK I LNSHDSKNWLFKAKDIDQSEFDELEDF | 110 |

**Figure S2:** Protein sequences alignment among the GcvHs from different strains of *M. hyopneumoniae*
